# Supplementary figures and images for: Speed variations of bacterial replisomes
Source: eLife journal article supplement (doi:10.7554/elife.75884), 2022-07-25

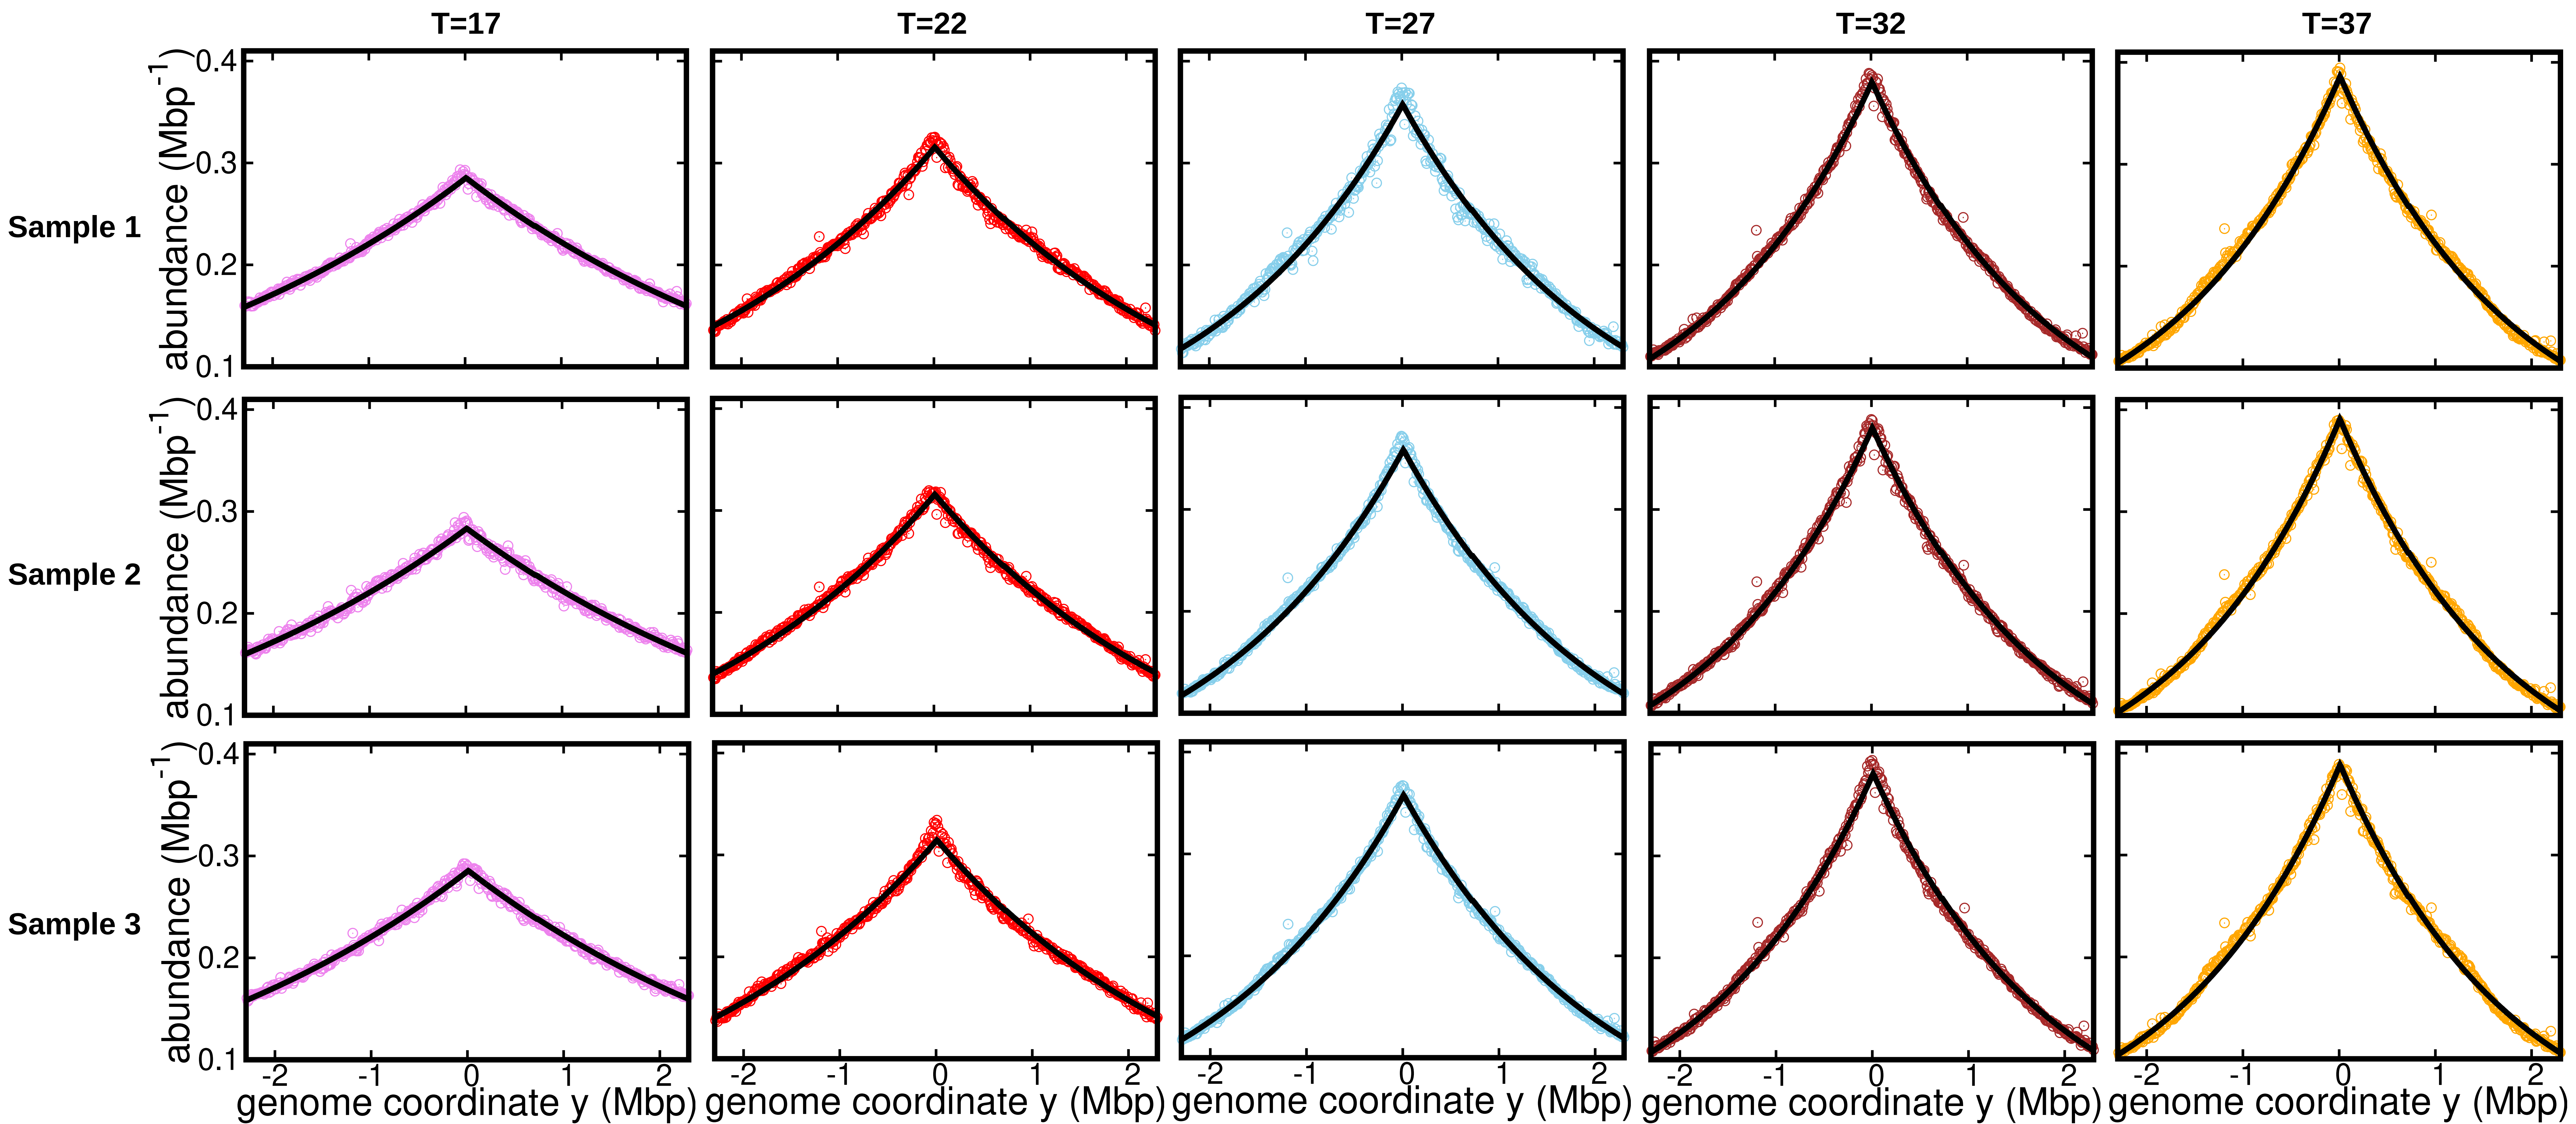

Supplement: supp [file elife_poa_e75884_Figure_2_figure_supplement_1.pdf › elife_poa_e75884_Figure_2_figure_supplement_1.pdf]

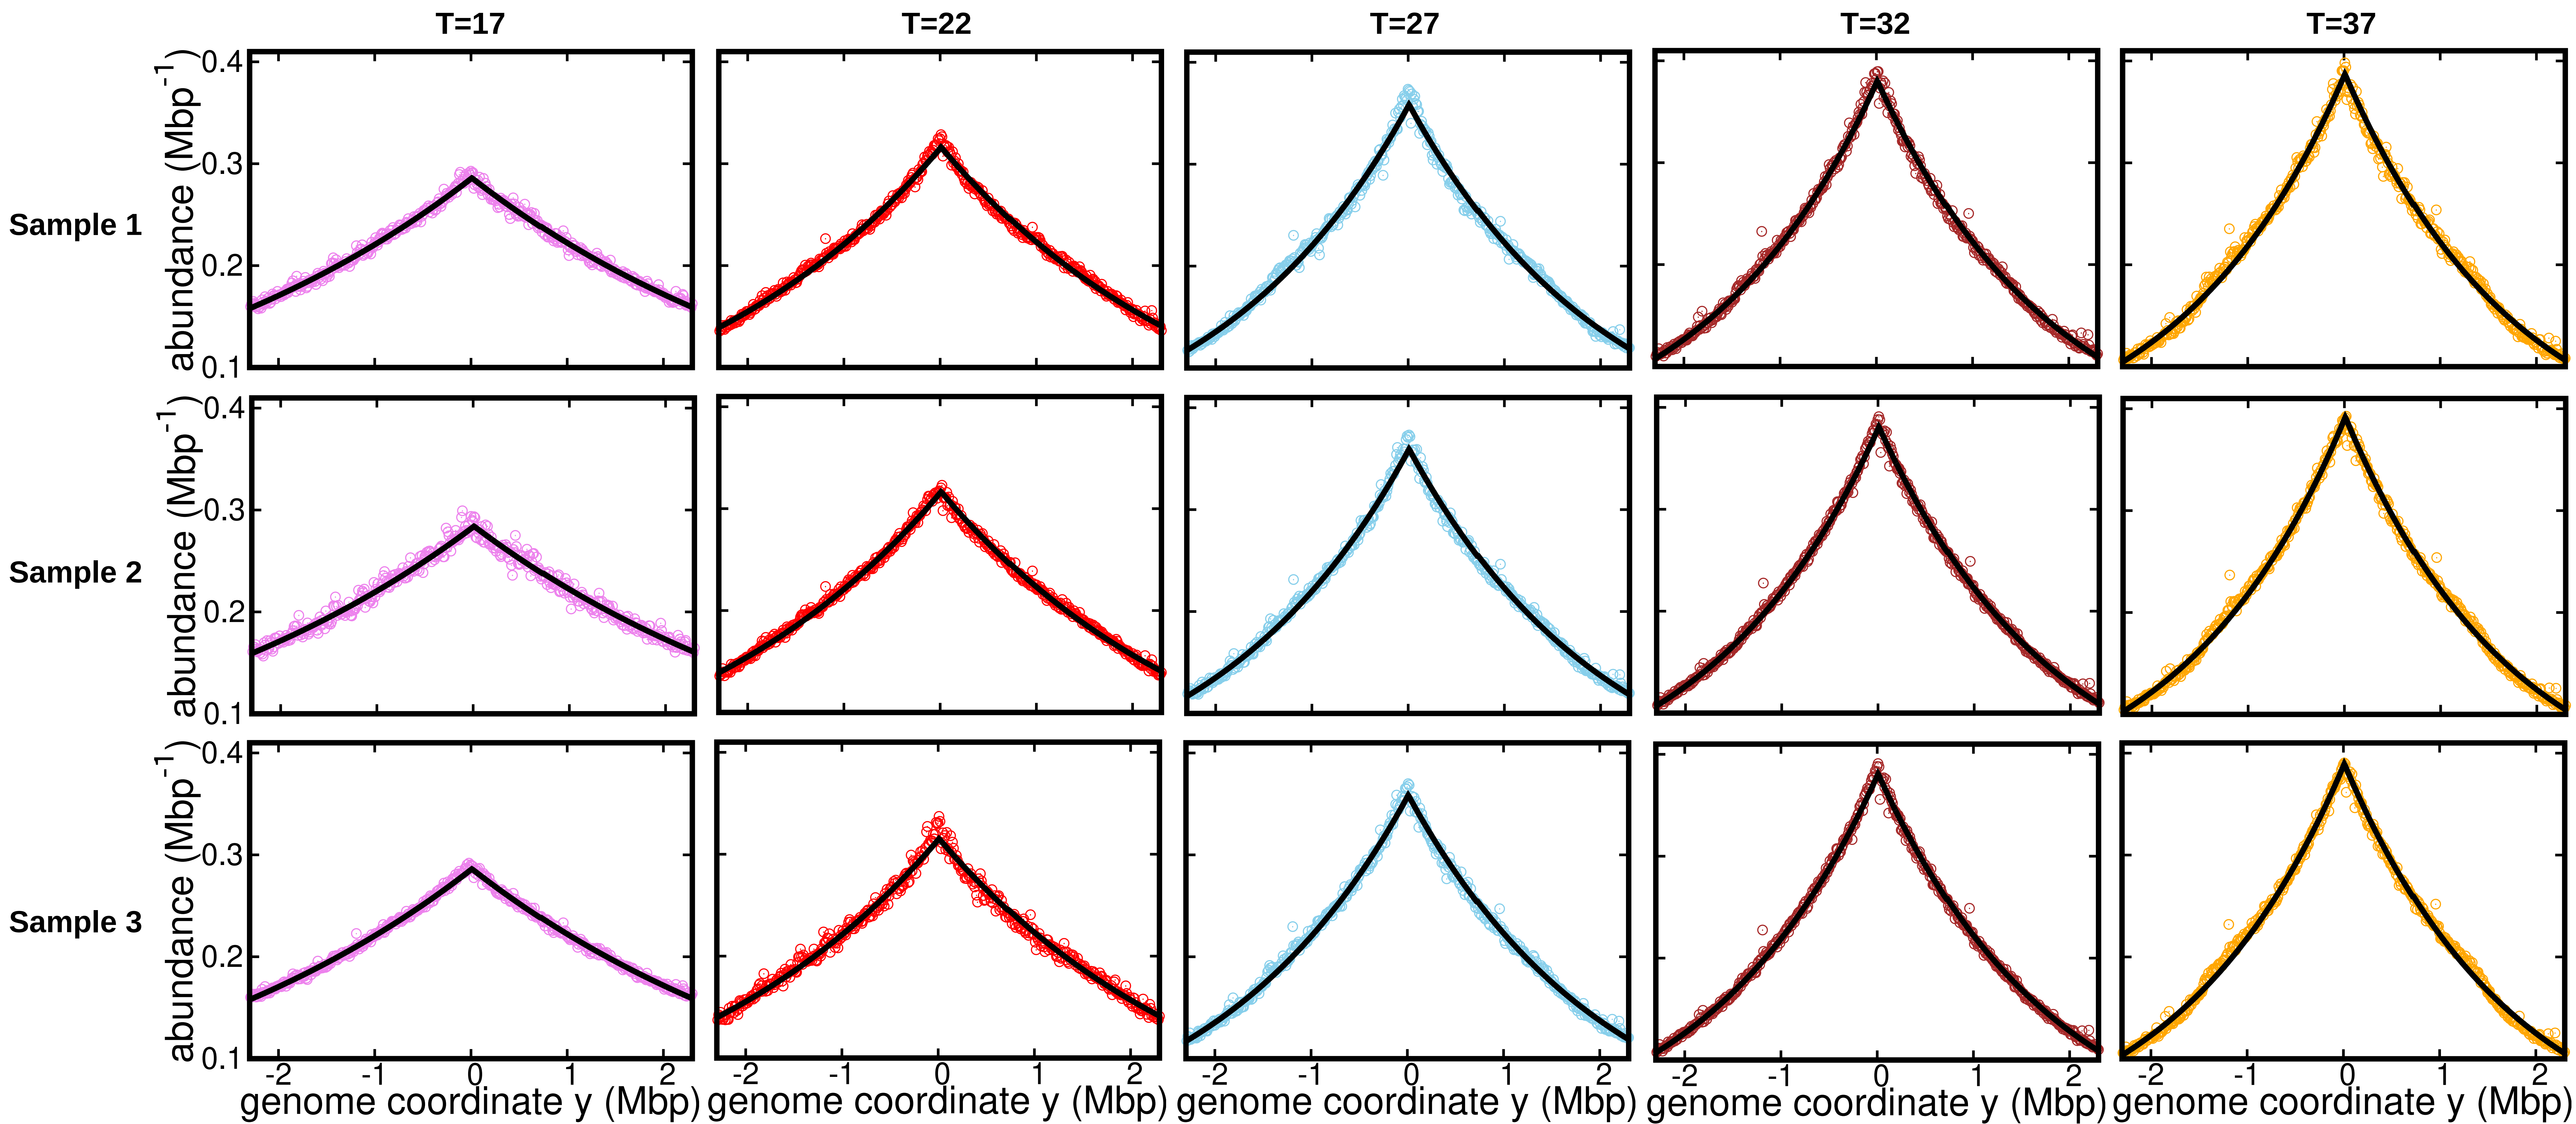

Supplement: supp [file elife_poa_e75884_Figure_2_figure_supplement_2.pdf › elife_poa_e75884_Figure_2_figure_supplement_2.pdf]

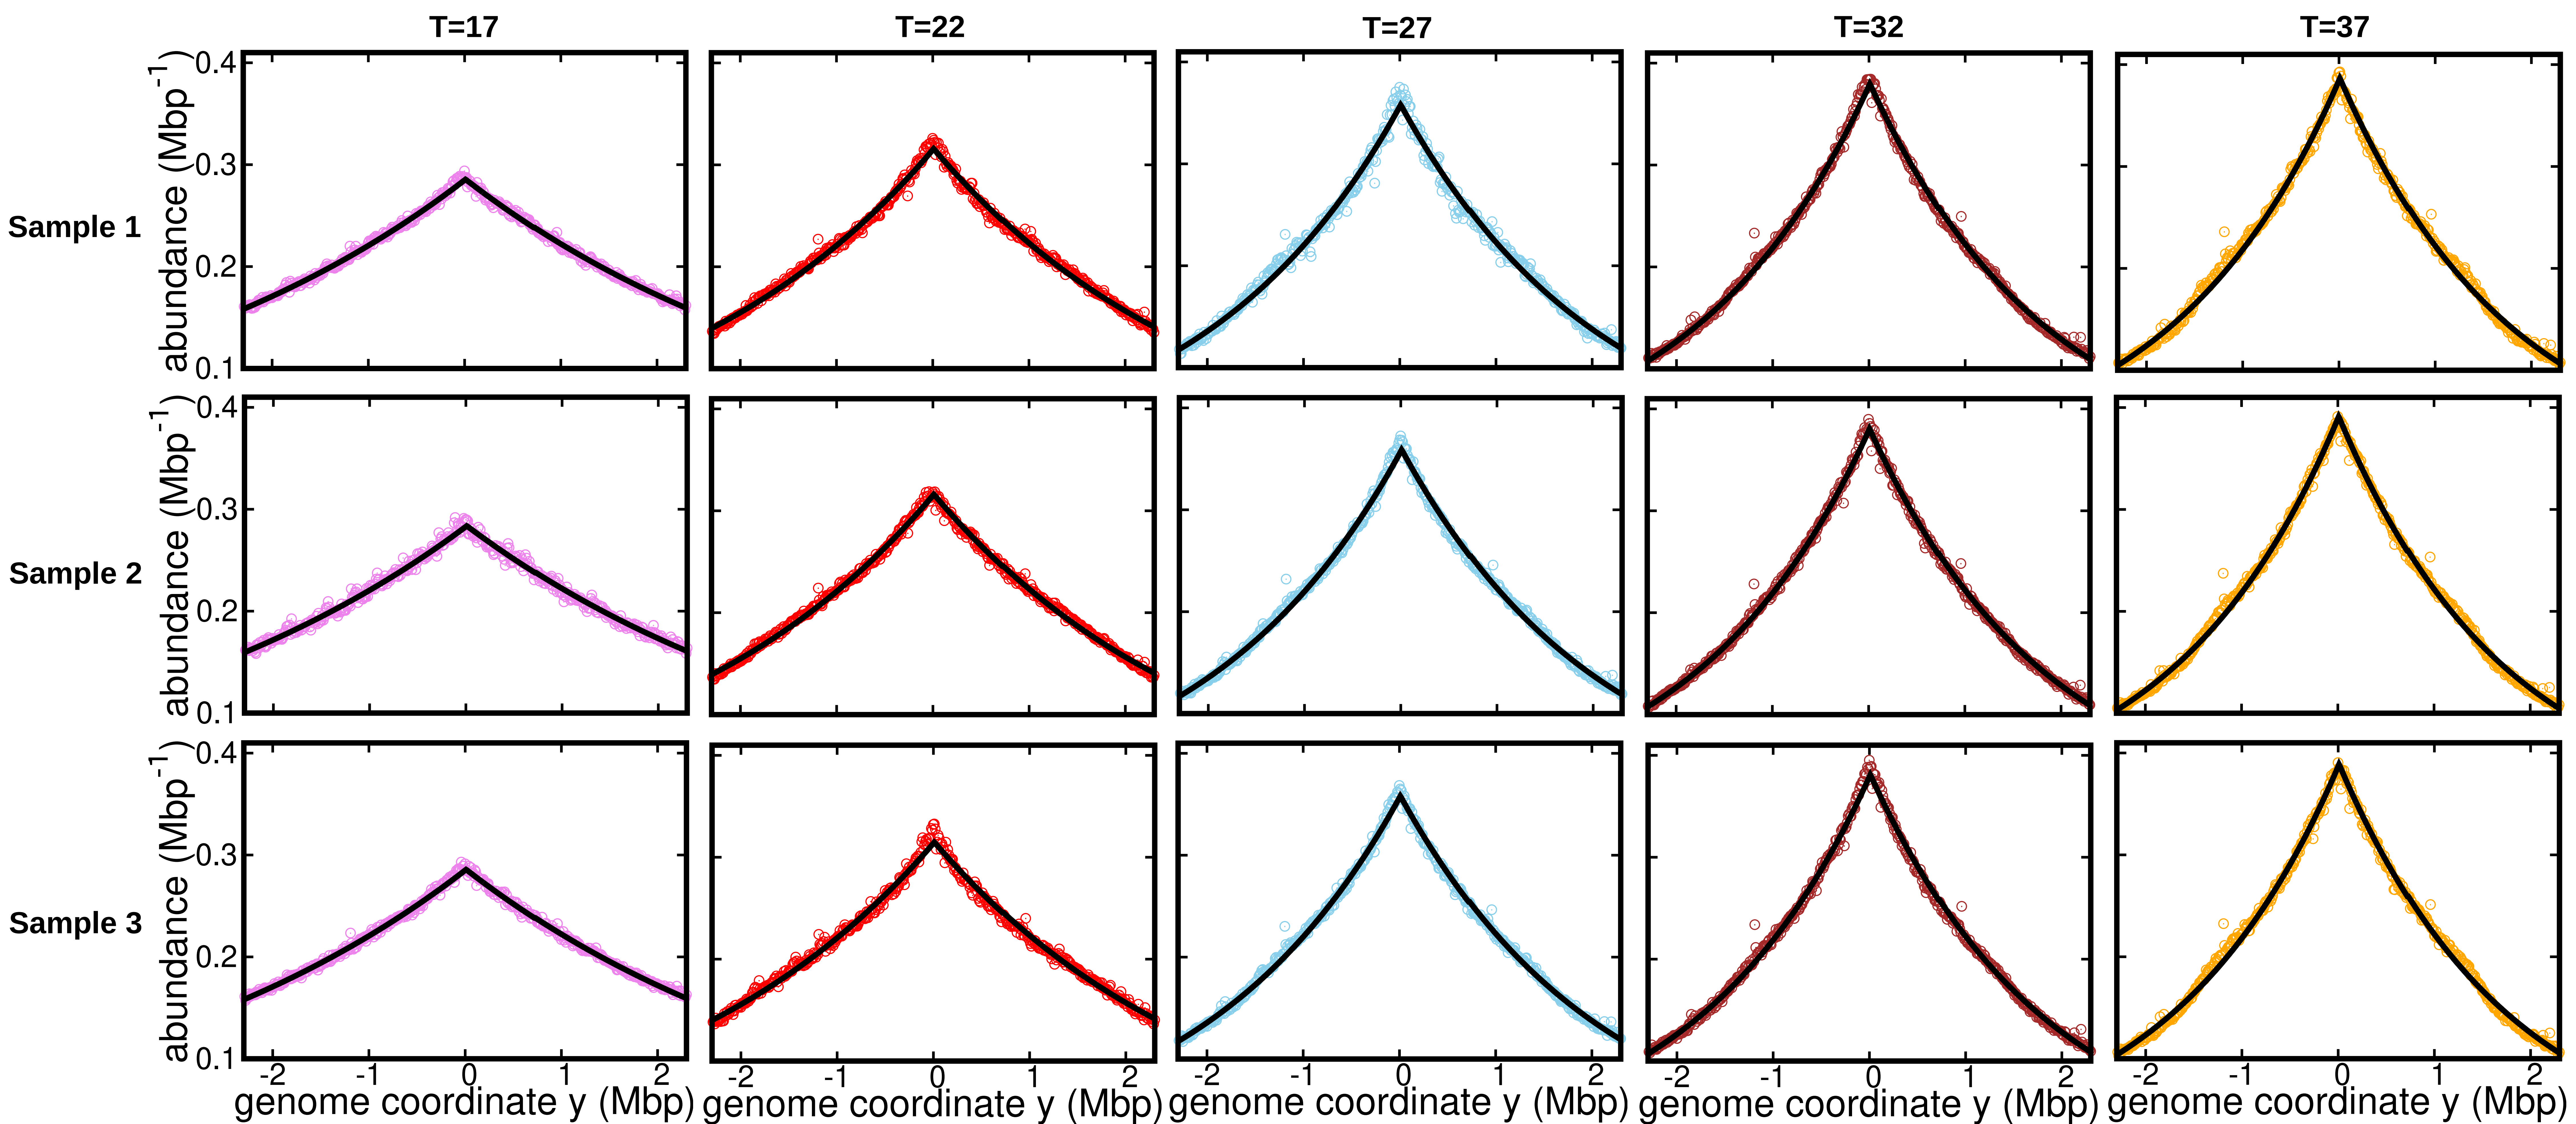

Supplement: supp [file elife_poa_e75884_Figure_2_figure_supplement_3.pdf › elife_poa_e75884_Figure_2_figure_supplement_3.pdf]

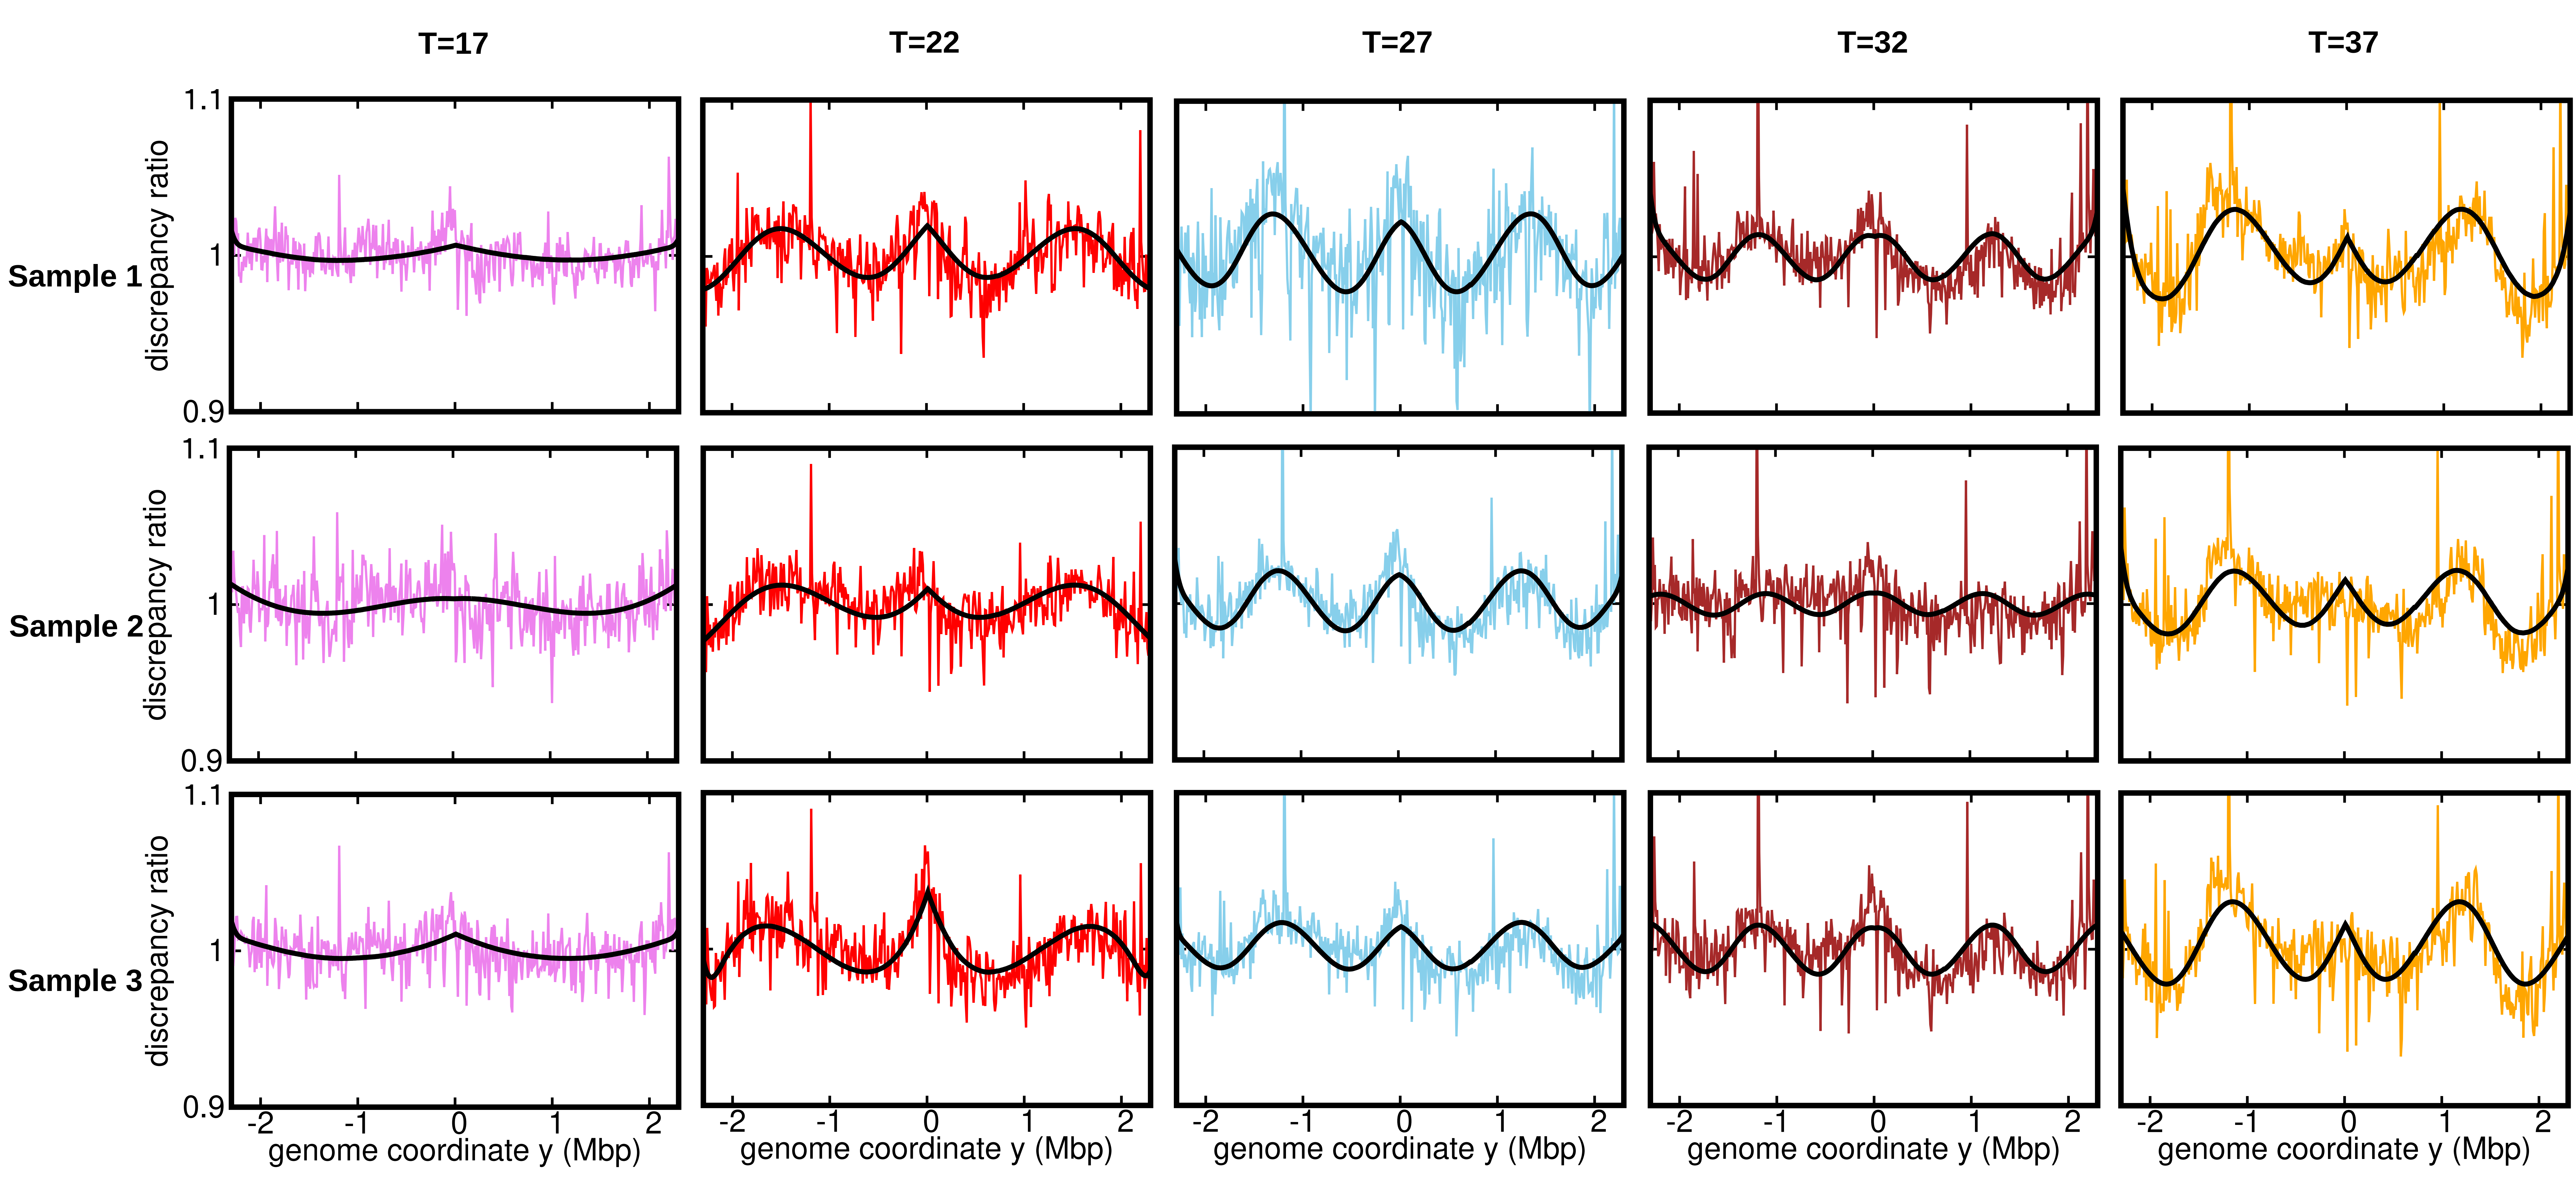

Supplement: supp [file elife_poa_e75884_Figure_3_figure_supplement_1.pdf › elife_poa_e75884_Figure_3_figure_supplement_1.pdf]

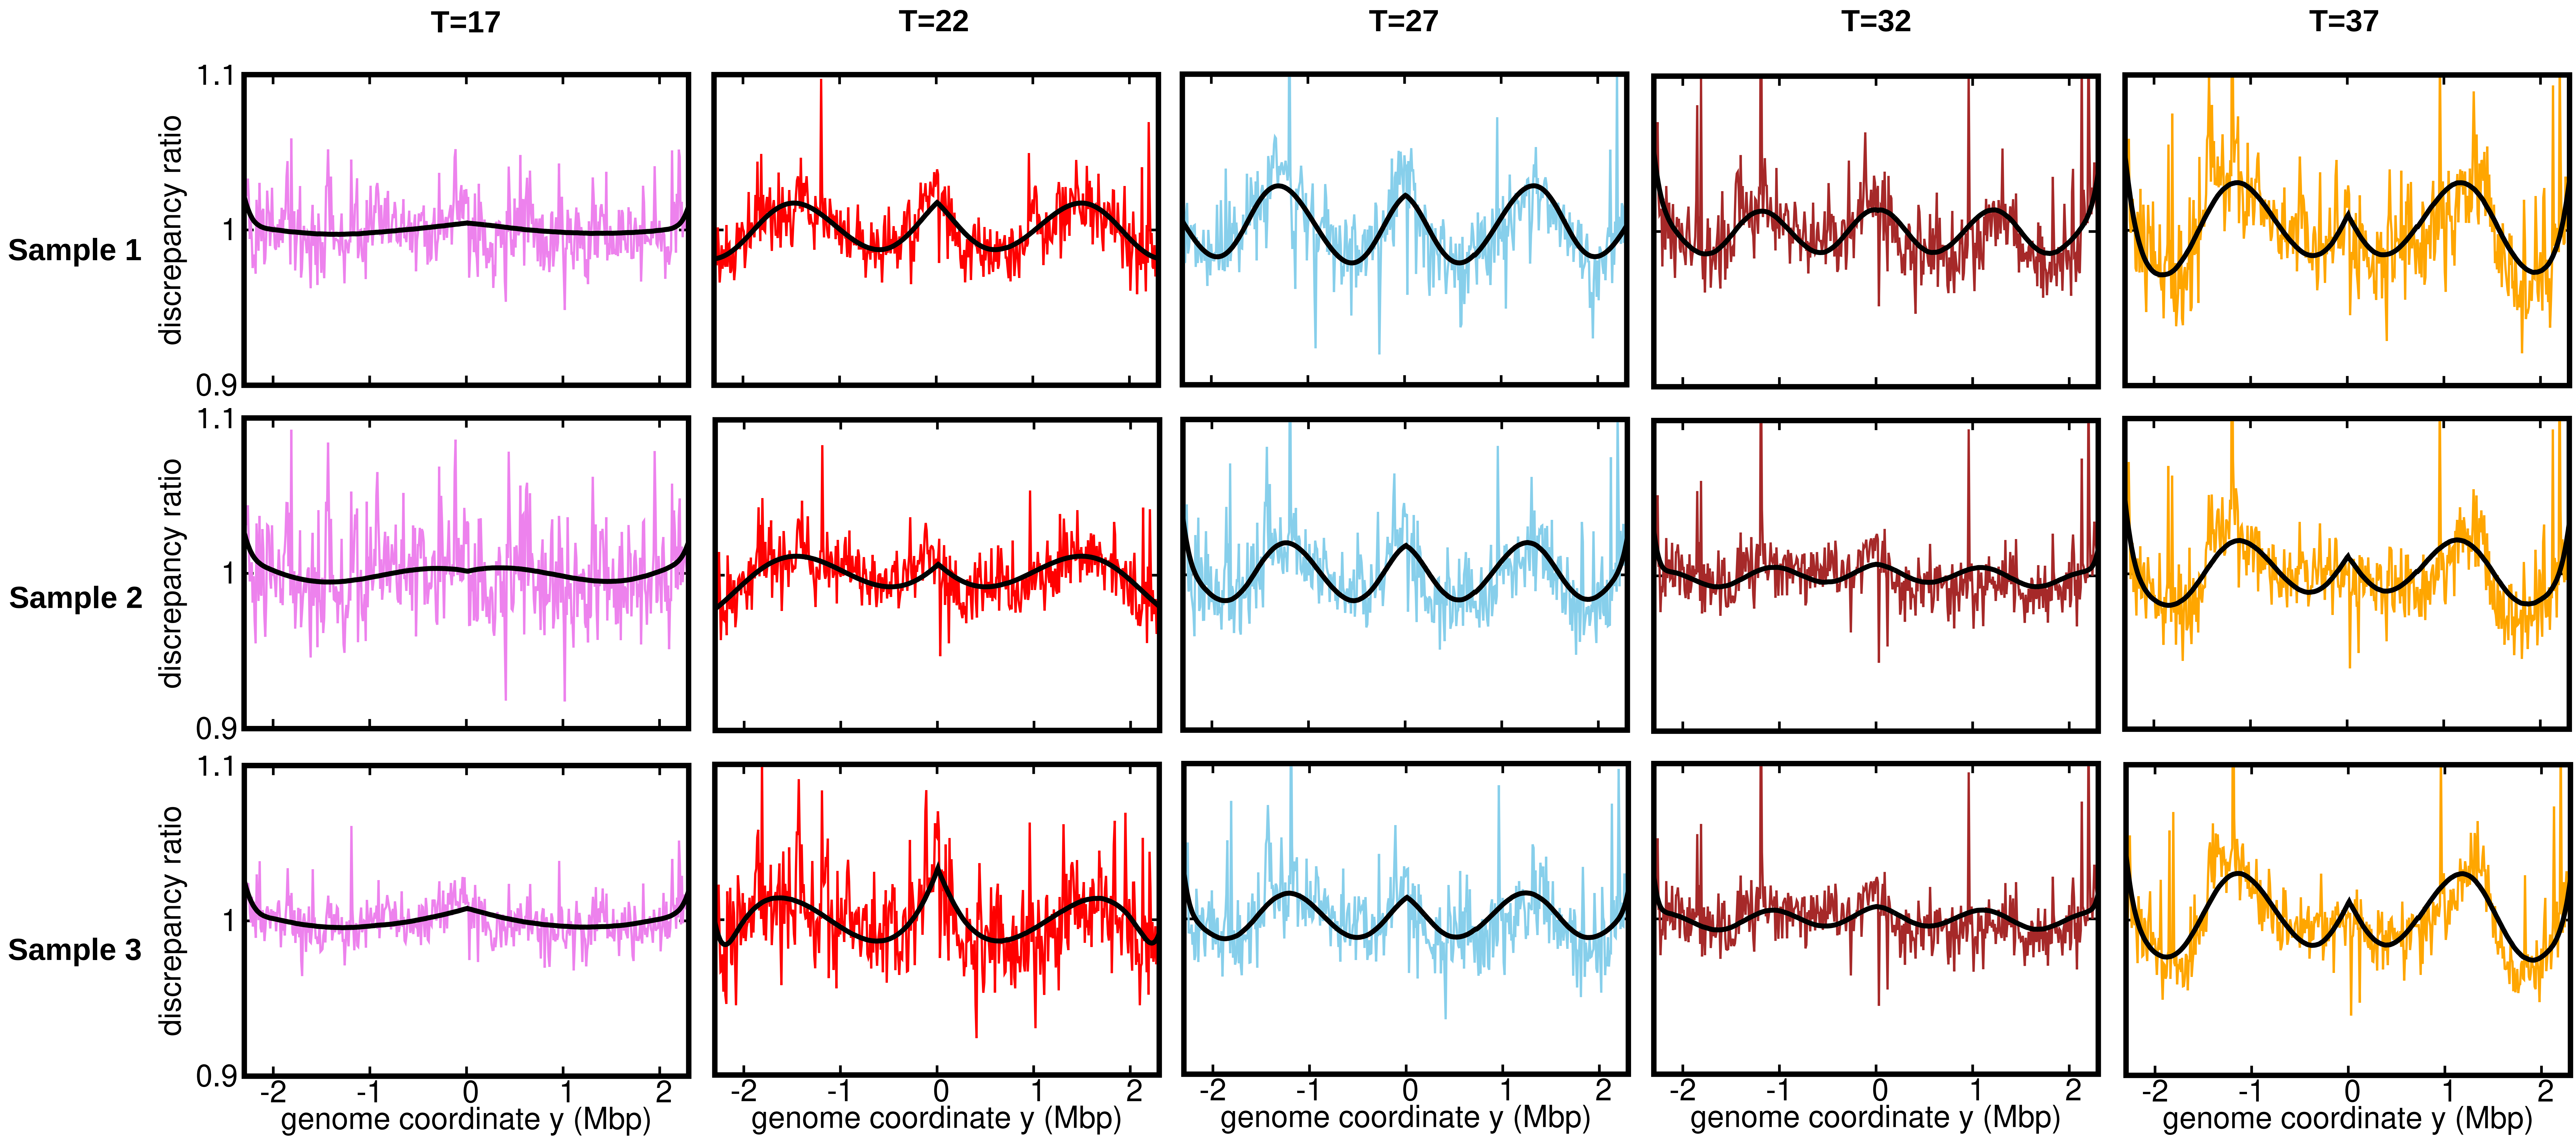

Supplement: supp [file elife_poa_e75884_Figure_3_figure_supplement_2.pdf › elife_poa_e75884_Figure_3_figure_supplement_2.pdf]

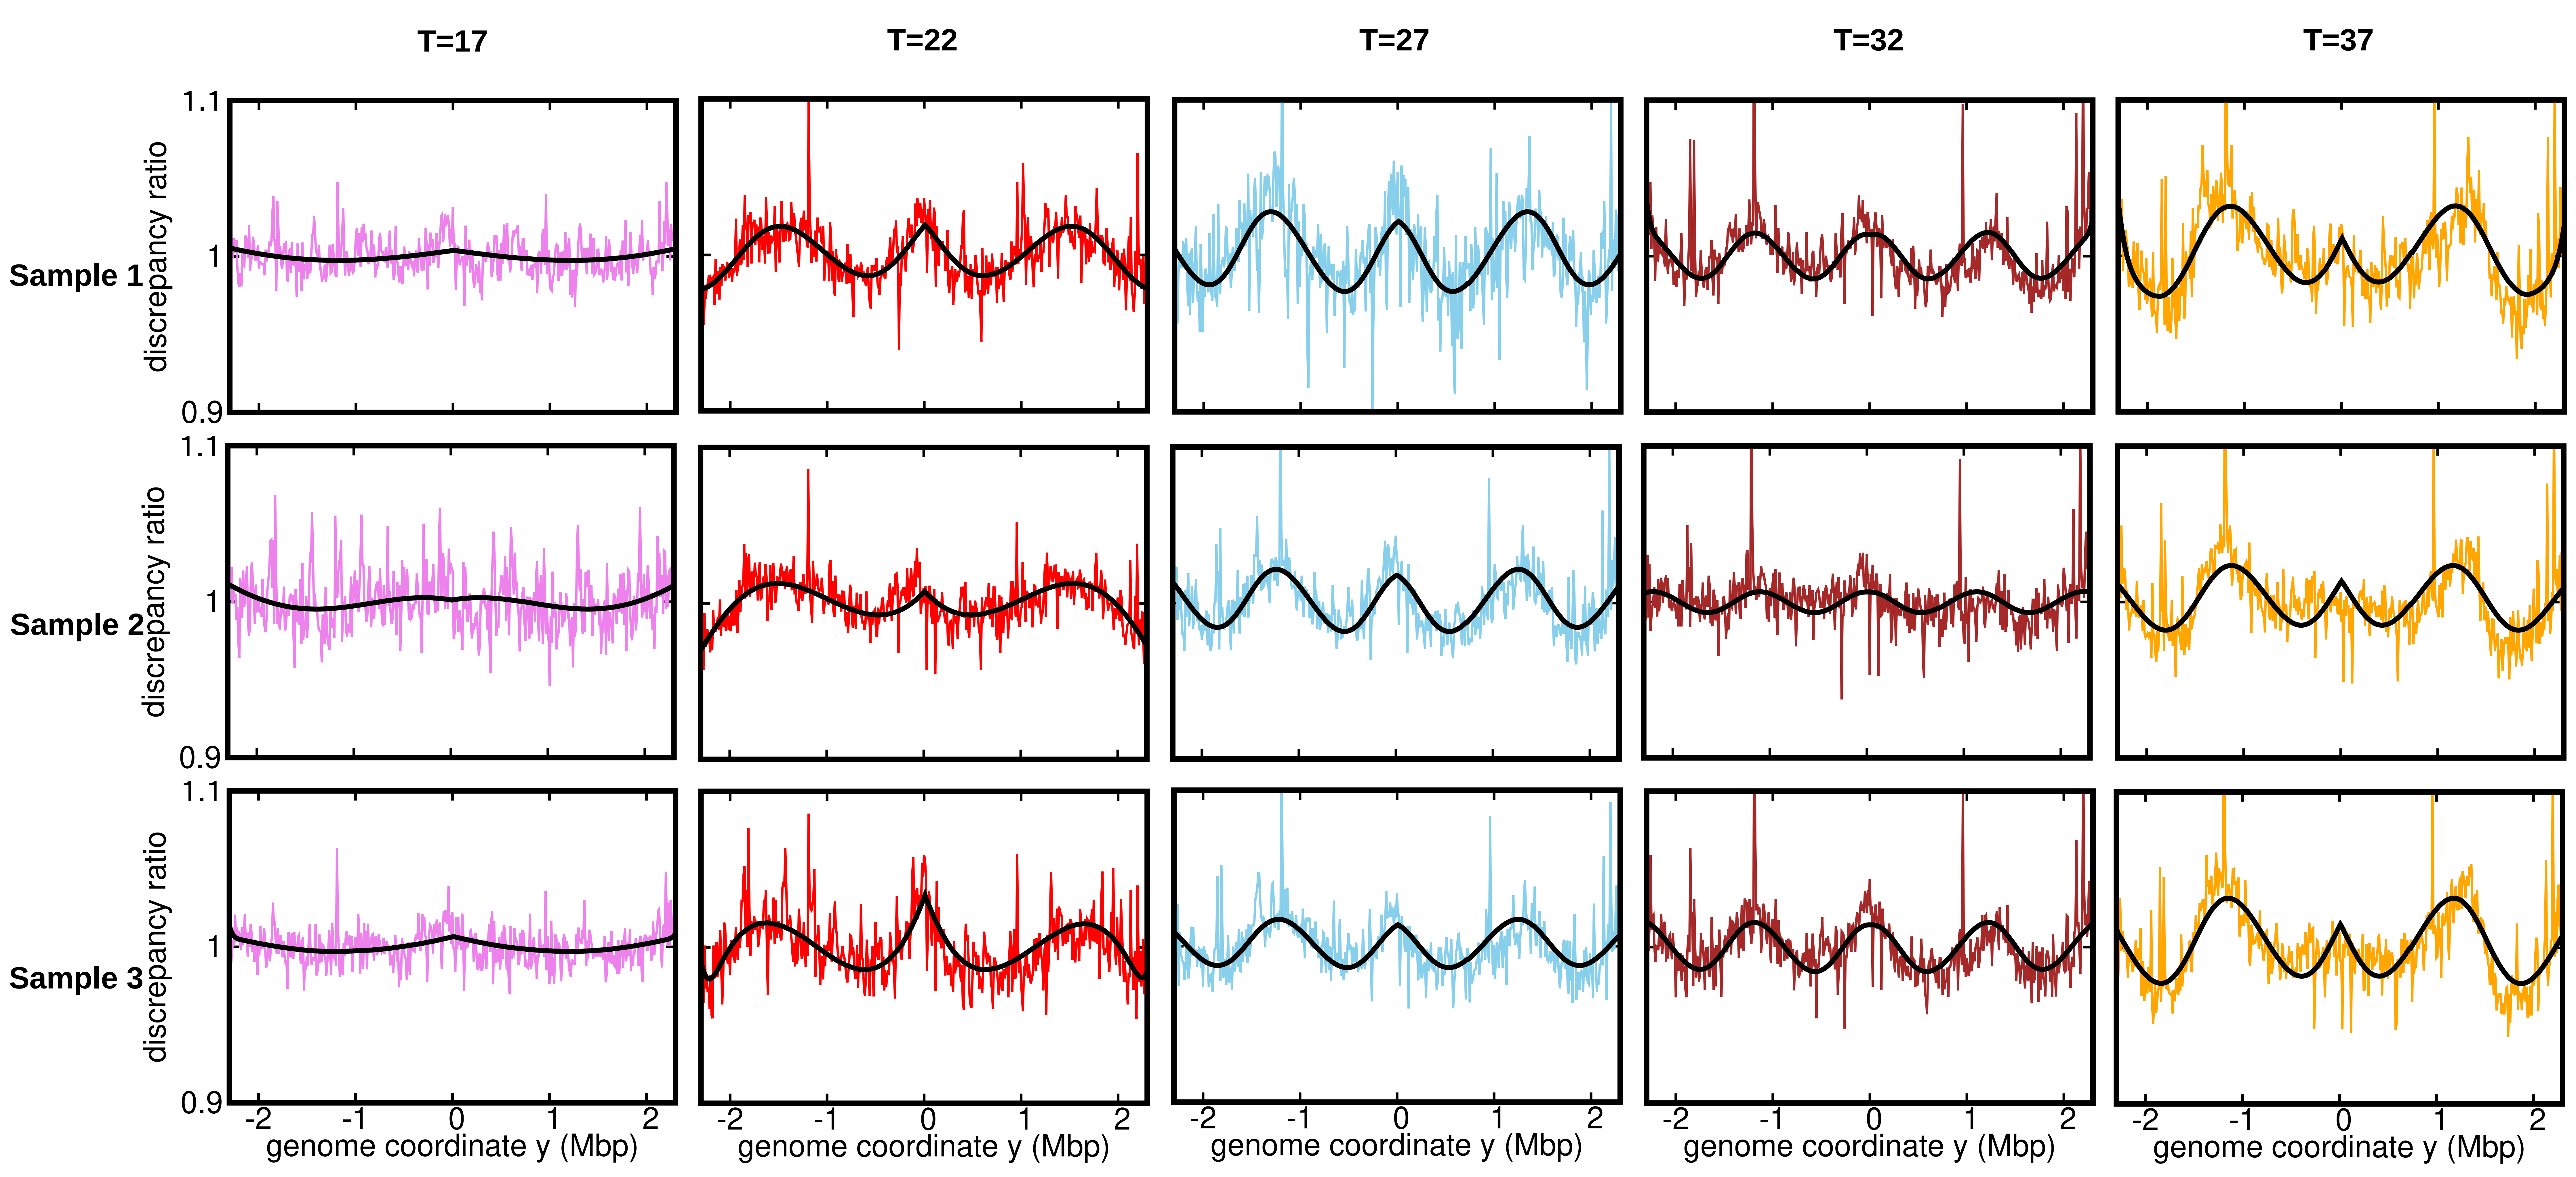

Supplement: supp [file elife_poa_e75884_Figure_3_figure_supplement_3.pdf › elife_poa_e75884_Figure_3_figure_supplement_3.pdf]

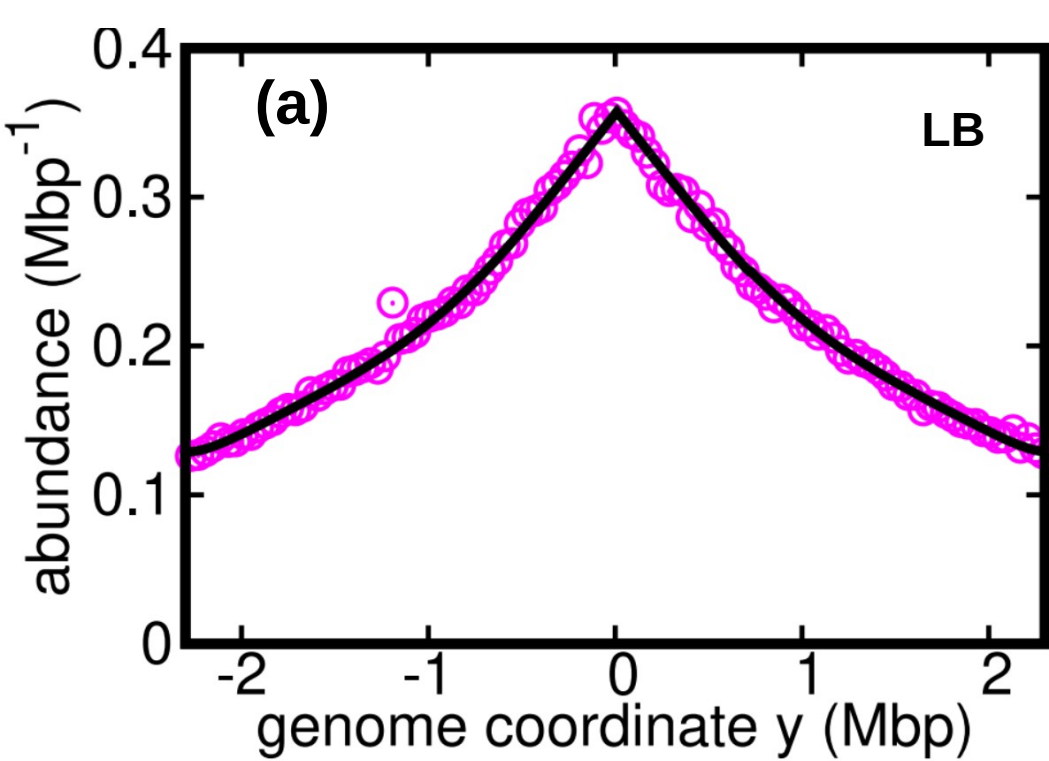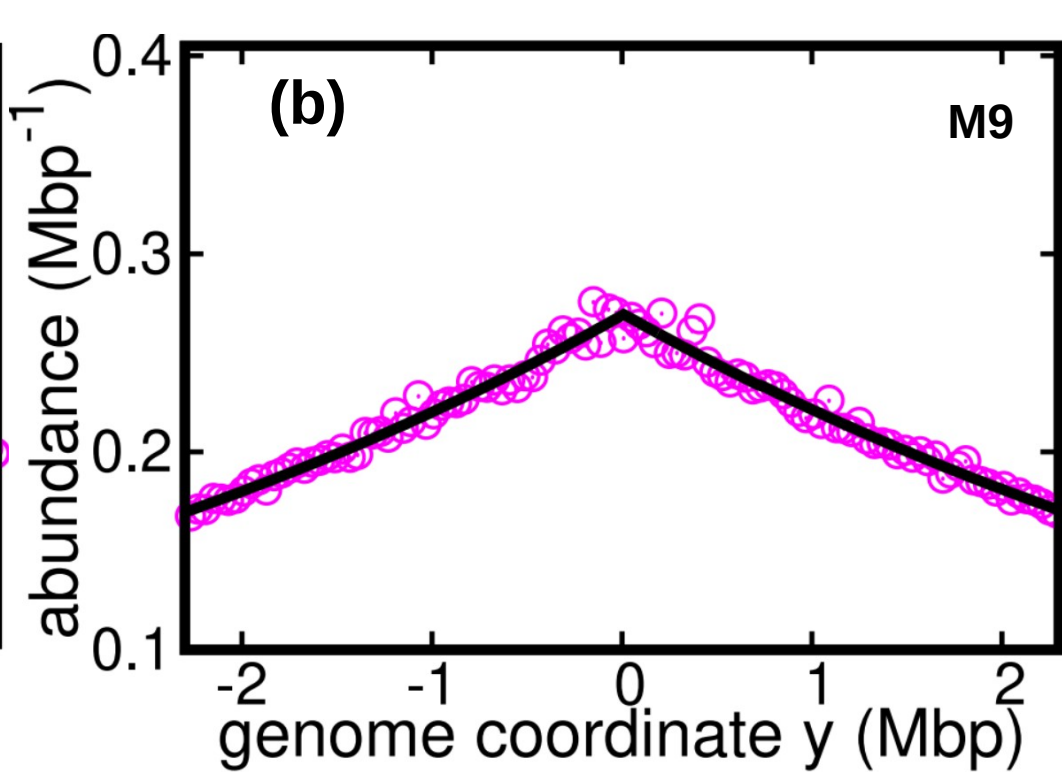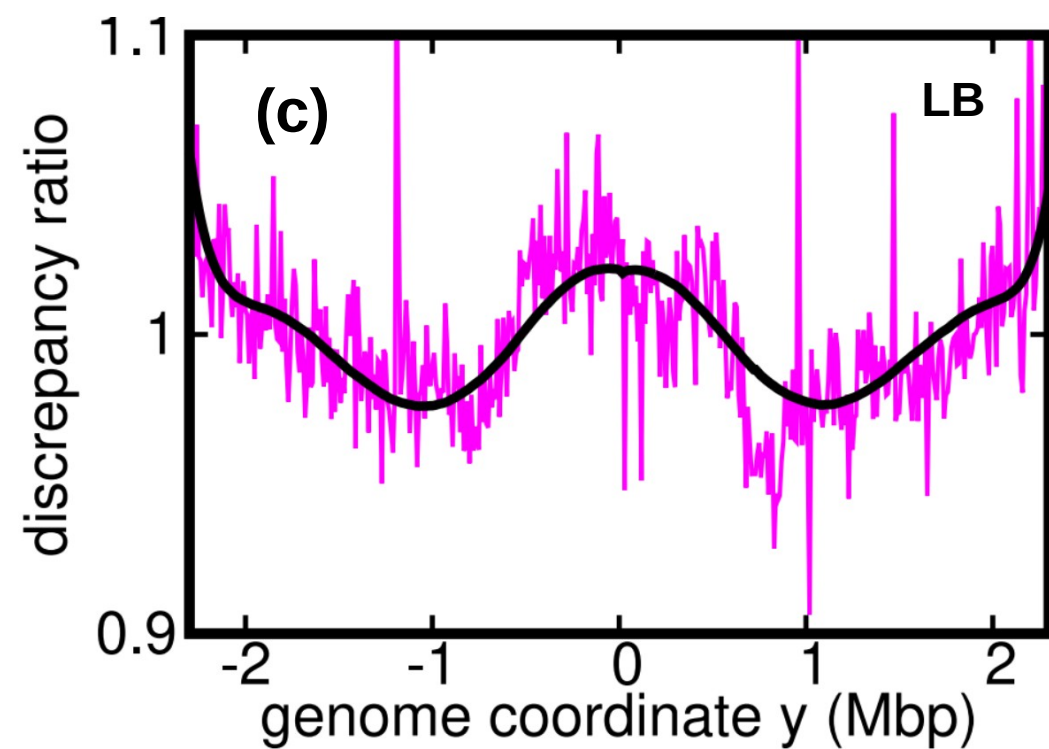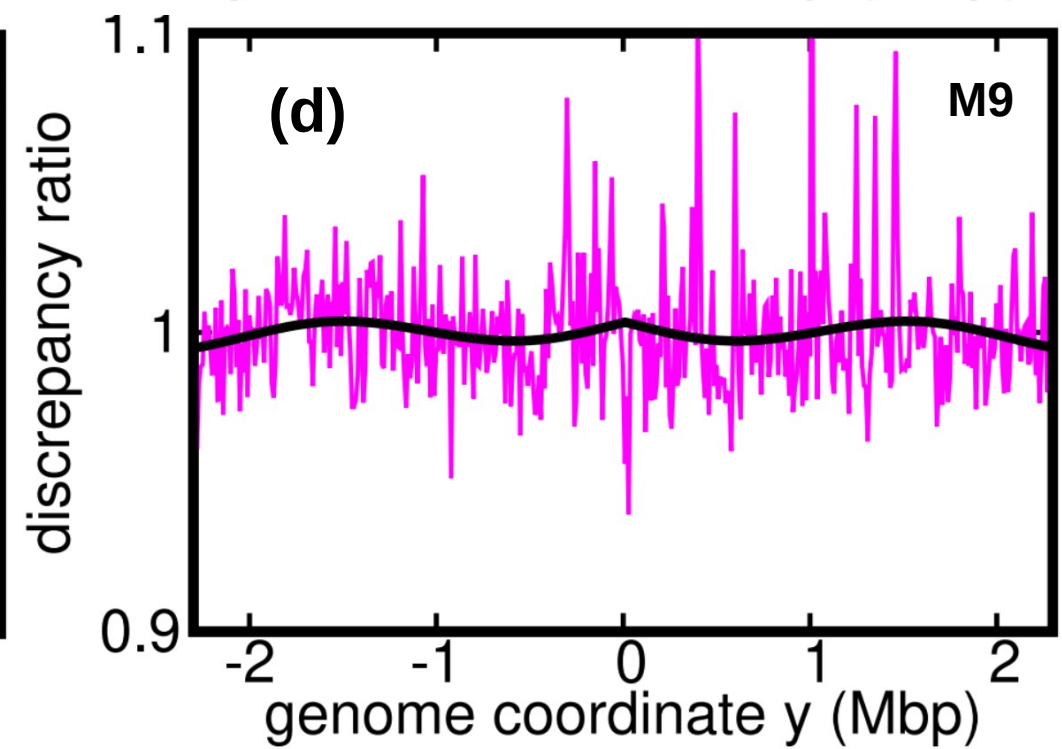

Supplement: supp [file elife_poa_e75884_Figure_3_figure_supplement_4.pdf › elife_poa_e75884_Figure_3_figure_supplement_4.pdf]

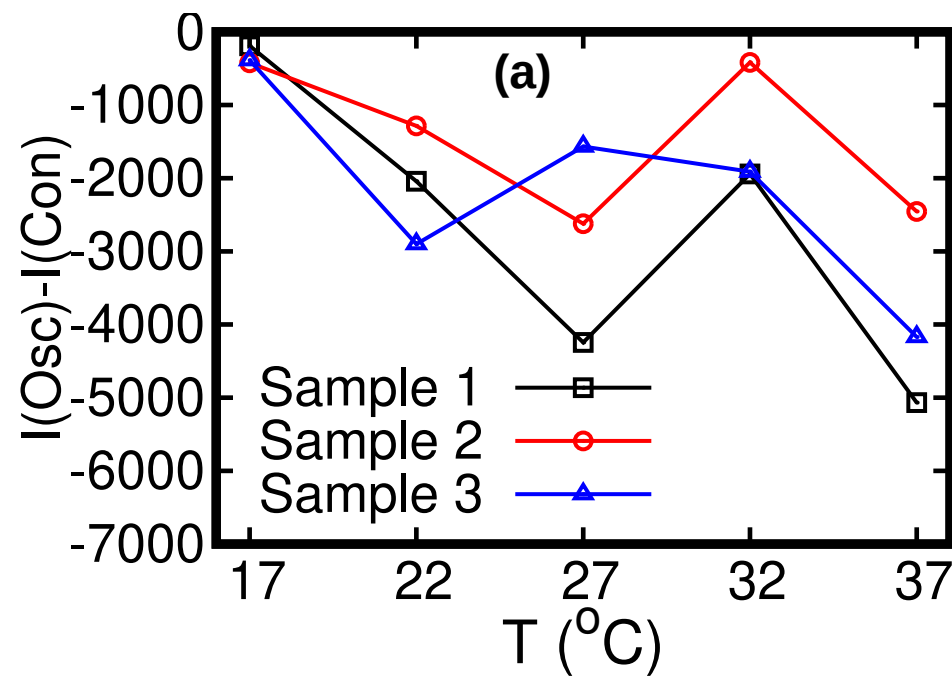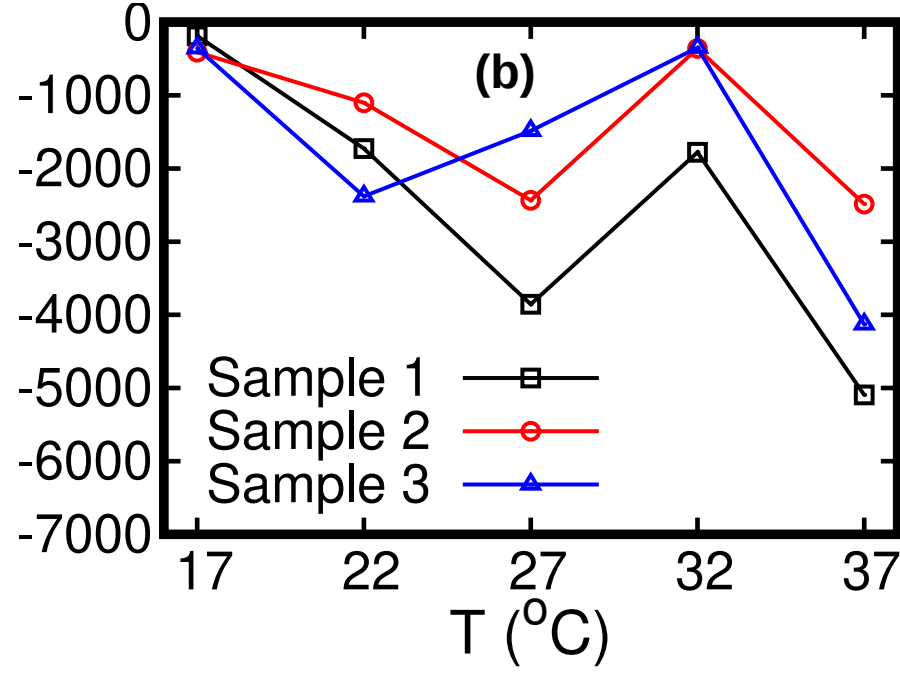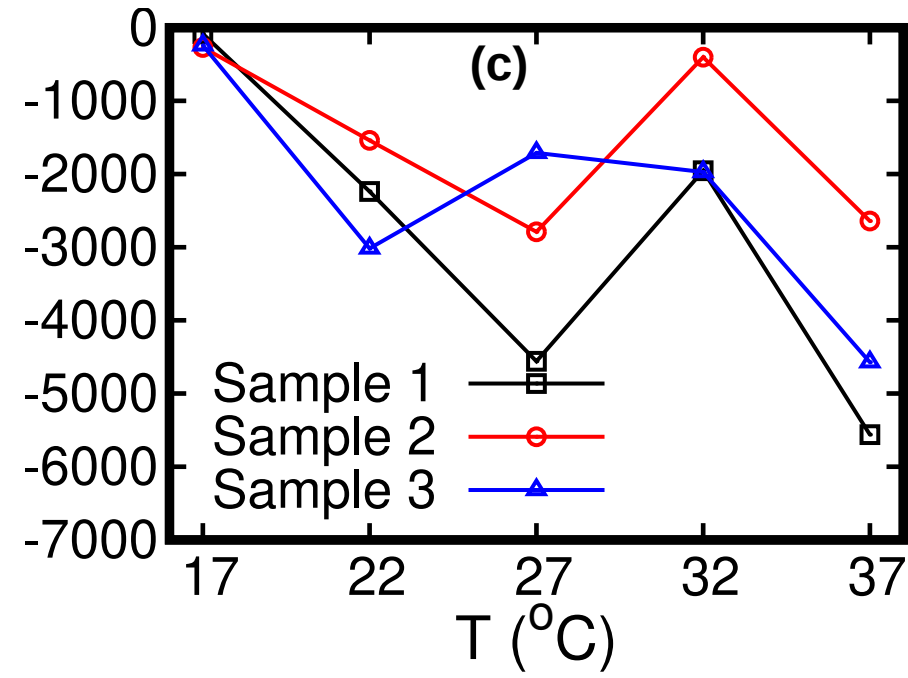

Supplement: supp [file elife_poa_e75884_Figure_3_figure_supplement_5.pdf › elife_poa_e75884_Figure_3_figure_supplement_5.pdf]

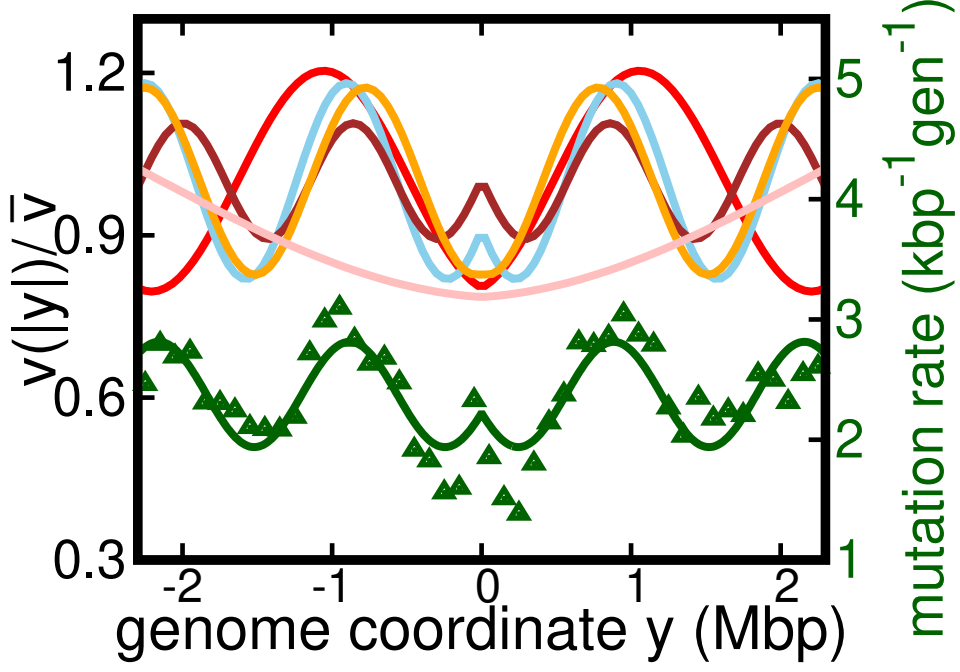

Supplement: supp [file elife_poa_e75884_Figure_4_figure_supplement_1.pdf › elife_poa_e75884_Figure_4_figure_supplement_1.pdf]

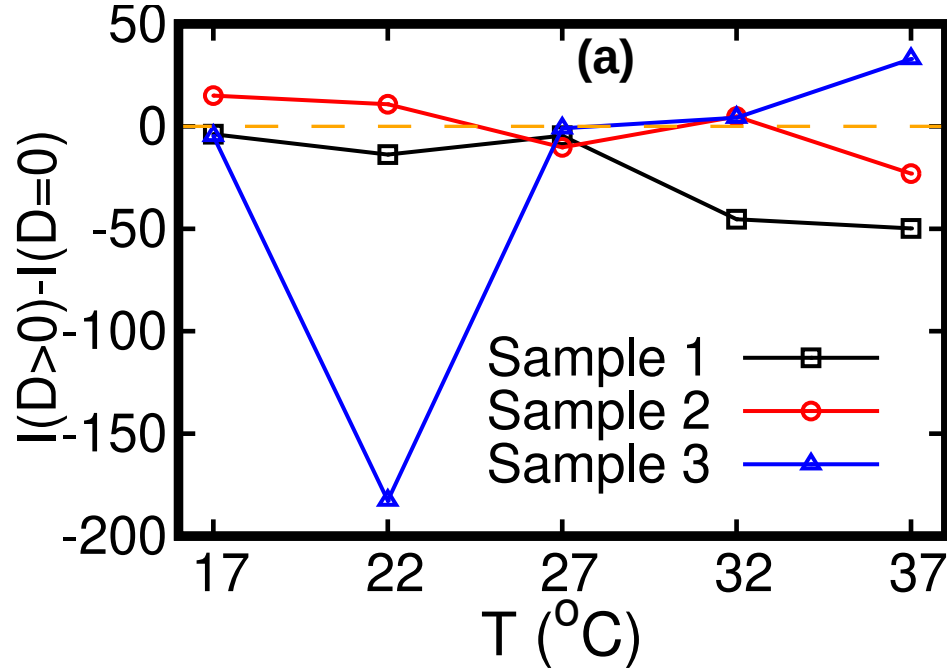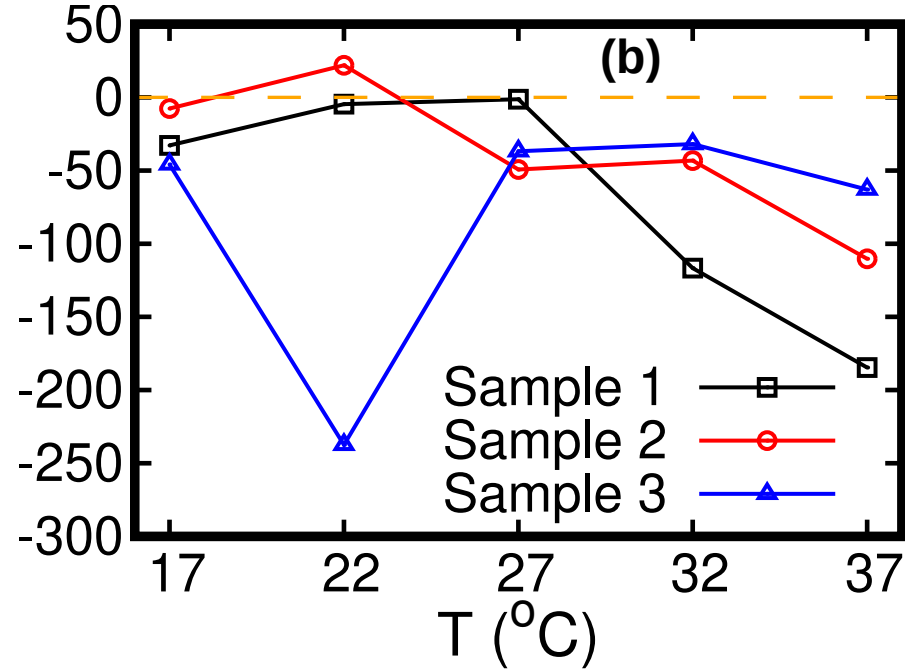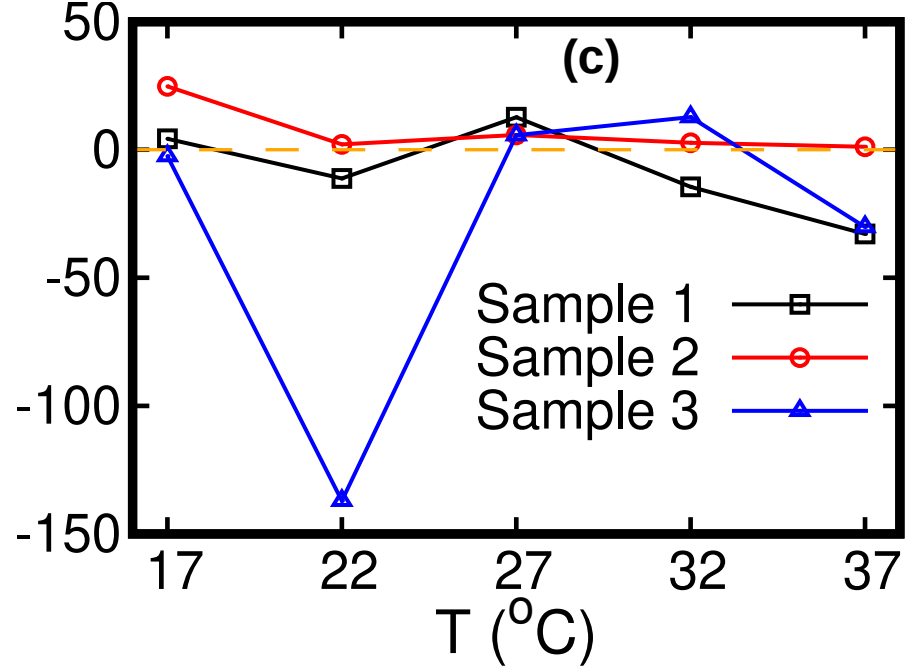

Supplement: supp [file elife_poa_e75884_Figure_4_figure_supplement_2.pdf › elife_poa_e75884_Figure_4_figure_supplement_2.pdf]

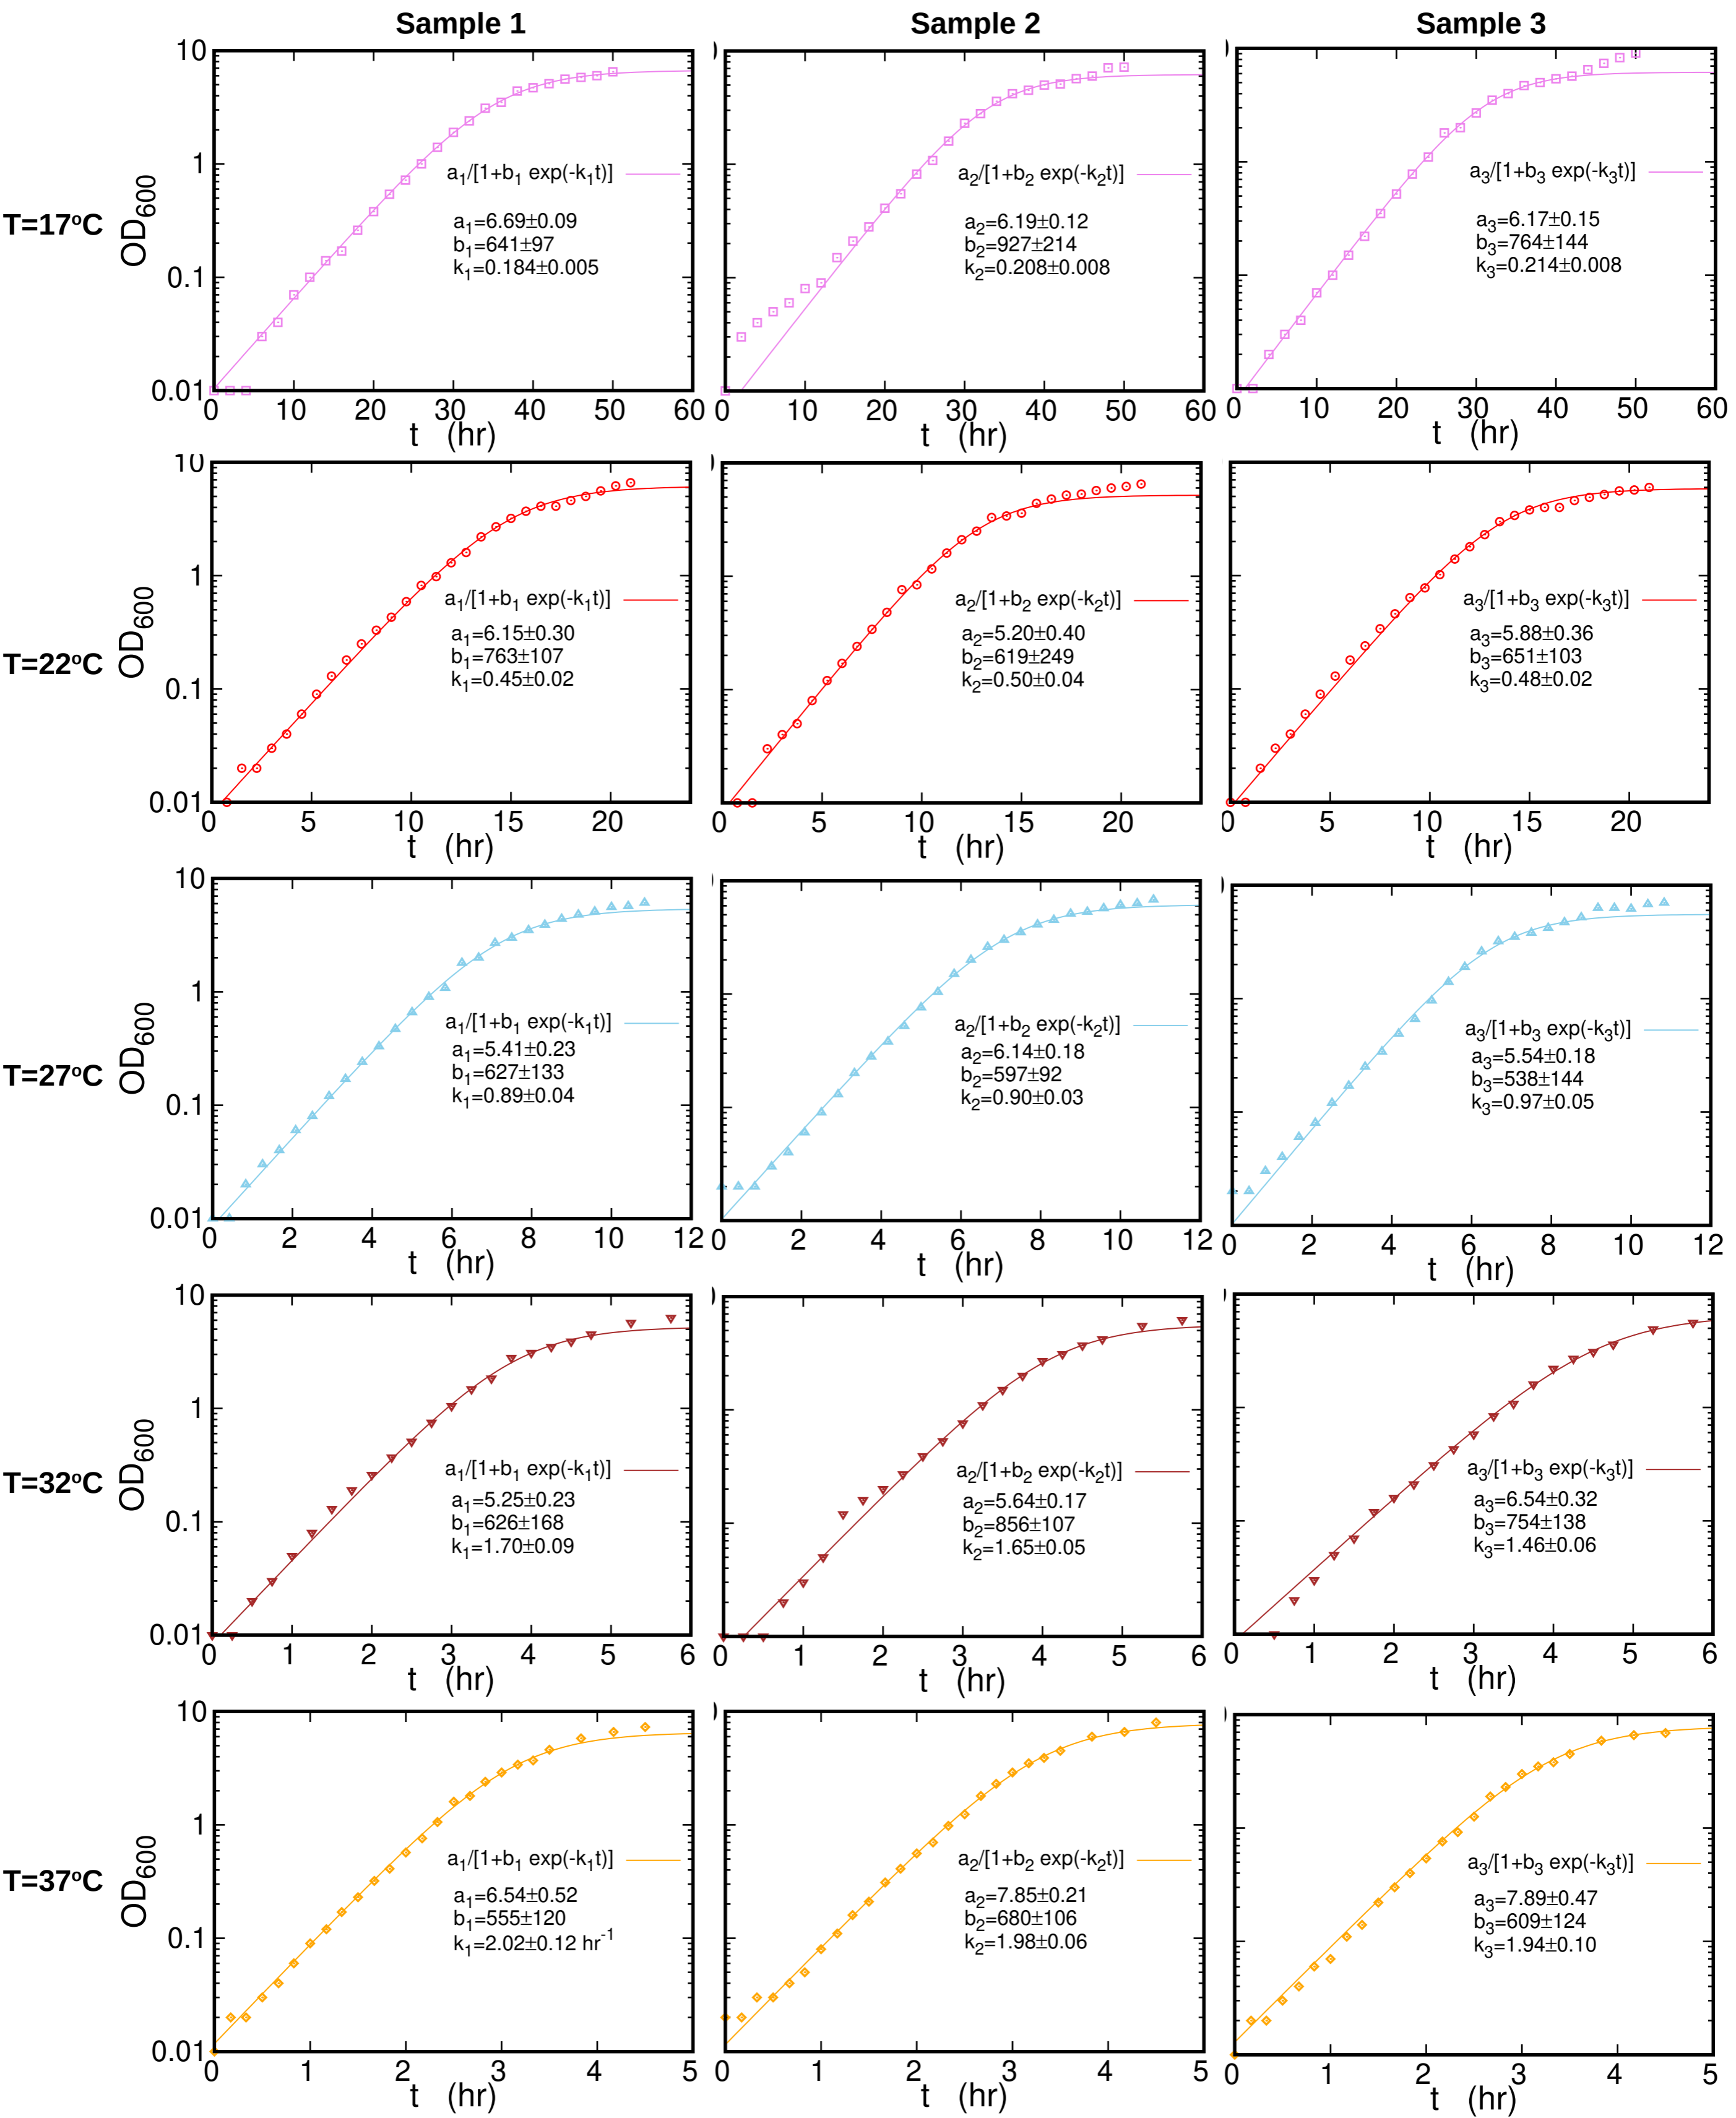

Supplement: supp [file elife_poa_e75884_Figure_5_figure_supplement_1.pdf › elife_poa_e75884_Figure_5_figure_supplement_1.pdf]
